# Supplementary material for: Inactivation of ribosomal protein S27-like confers radiosensitivity via the Mdm2-p53 and Mdm2–MRN–ATM axes
Source: PubMed Central journal article supplement (PMC5833388; doi:10.1038/s41419-017-0192-3), 2018-02-02

## Supplemental Materials

### **Figure S1. *Rps27l* inactivation reduces proliferation and induces apoptosis in the spleen and thymus of *Trp53*<sup>+/-</sup> mice upon radiation exposure.**

(A) *Rps27l* inactivation inhibits proliferation of splenocytes in *Trp53*<sup>+/-</sup> mice upon radiation. BrdU was i.p. injected into WT littermates and *Rps27l* mutants 2 hours before mice being sacrificed. Spleens were harvested, followed by BrdU staining. Scale bar represents 200  $\mu\text{m}$ .

(B-D) *Rps27l* inactivation induces apoptosis in small intestine (B), thymuses (C) and spleens (D) from *Trp53*<sup>+/-</sup> mice upon radiation. Mice with indicated genotypes were sacrificed at indicated time points post irradiation. Tissues were harvested and subjected to IHC staining with cleaved caspase-3 antibody. Scale bar represents 100  $\mu\text{m}$ .

(E) Inactivation of *Rps27l* sensitizes *Trp53*<sup>+/-</sup> MEFs to radiation. Immortalized MEFs were seeded in 60 mm dishes in triplicate and irradiated. The colonies with more than 50 cells were counted after 7 days. Surviving fraction was calculated as the proportion of seeded cells following irradiation to form colonies relative to that of *Rps27l*<sup>+/+</sup>; *Trp53*<sup>+/-</sup> MEFs (mean  $\pm$  SEM, n= 3).

### **Figure S2. *Rps27l* inactivation causes an increase of p53 and its targets upon radiation.**

(A&B) *Rps27l* inactivation increases p53 staining in the thymus (A) and bone marrow (B) of *Trp53*<sup>+/-</sup> mice upon radiation exposure. Mice with indicated genotypes were irradiated at 8 Gy, thymuses were harvested or femurs from hind limb were fixed at indicated time points, followed by IHC staining with p53 antibody. Scale bar represents 20  $\mu\text{m}$ .

**Figure S3. Heterozygous deletion of Mdm2 shortens the survival of Rps27l-null mice under *Trp53*<sup>+/-</sup> background.**

Kaplan–Meier survival curves of mice with genotype of *Rps27l*<sup>-/-</sup>;*Trp53*<sup>+/+</sup>, *Rps27l*<sup>-/-</sup>;*Trp53*<sup>+/-</sup> and *Rps27l*<sup>-/-</sup>;*Trp53*<sup>+/-</sup>;*Mdm2*<sup>+/-</sup>. The number in the parenthesis indicates the numbers of mice in each group. Log-rank test,  $p < 0.0001$ .

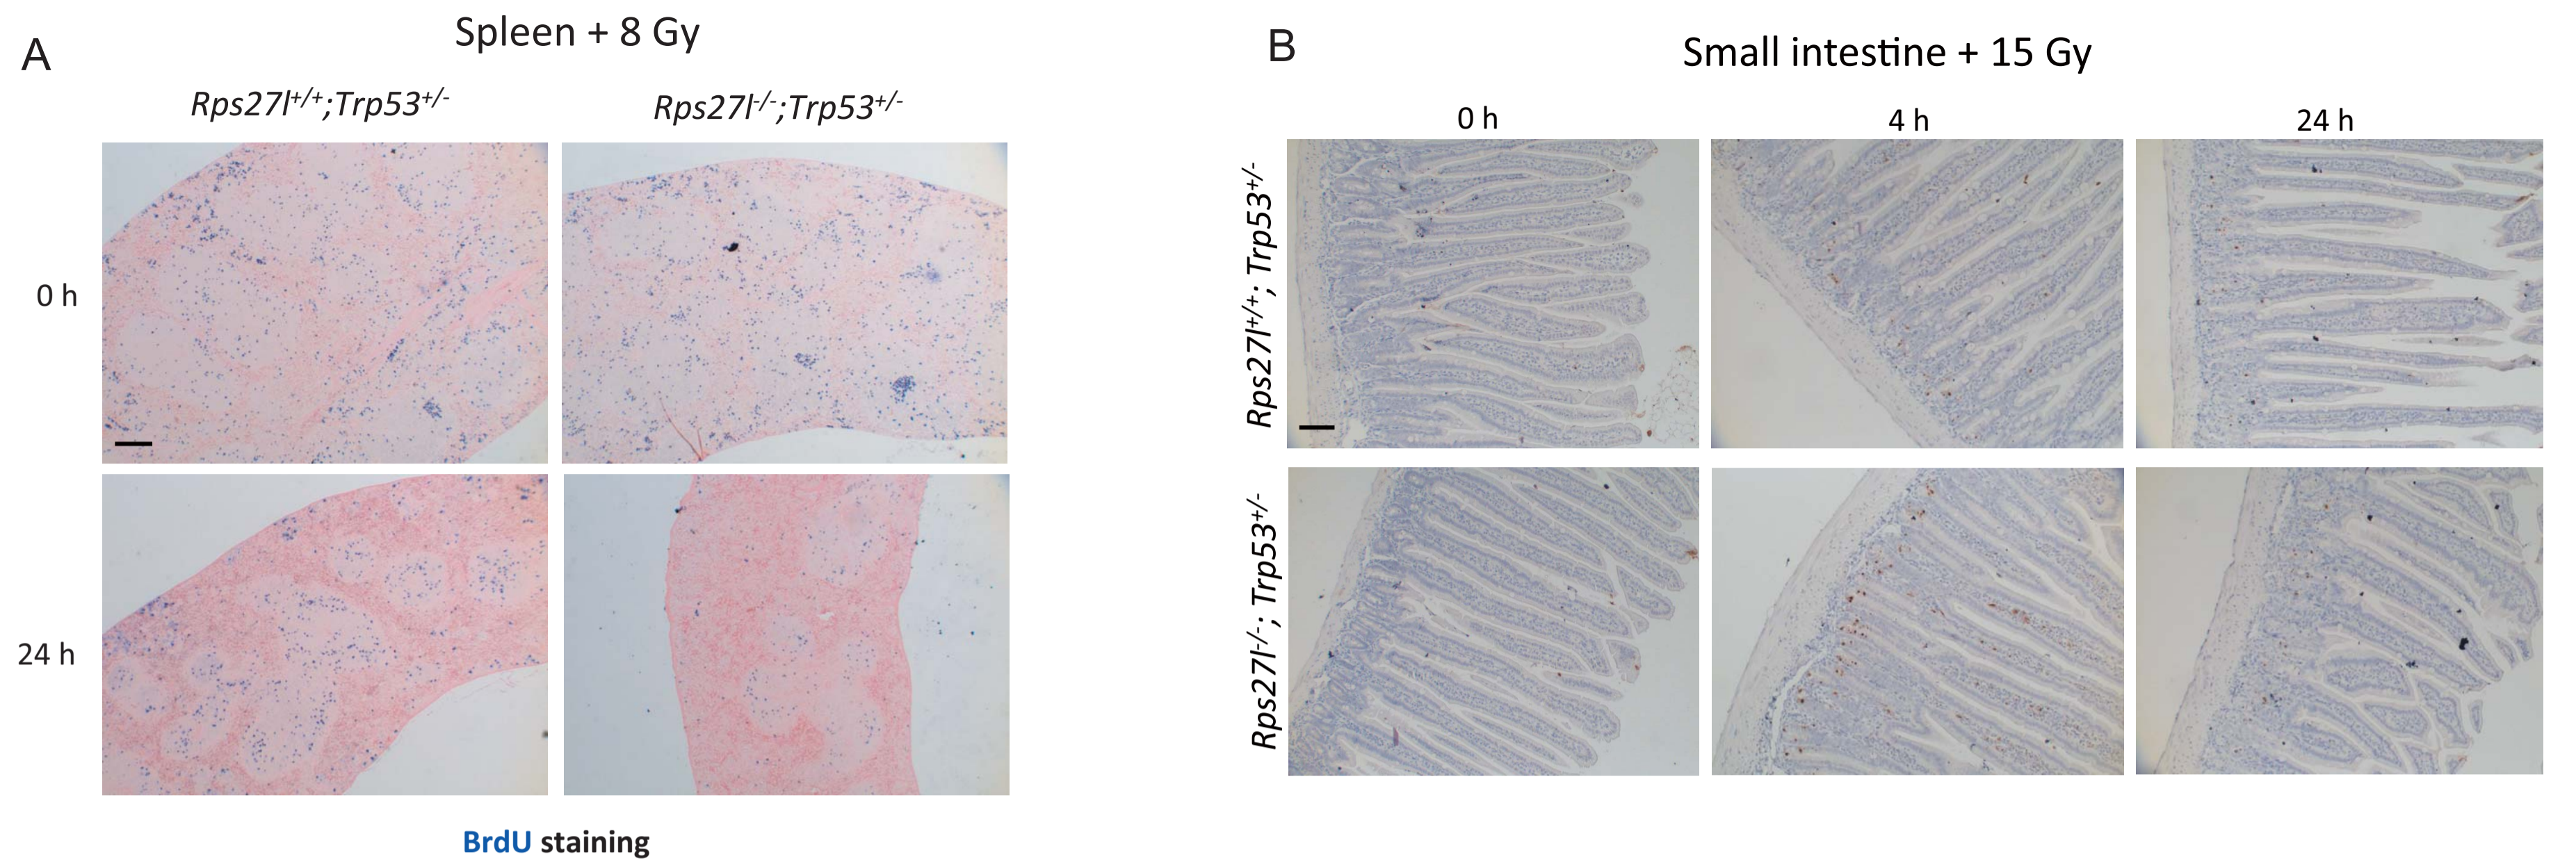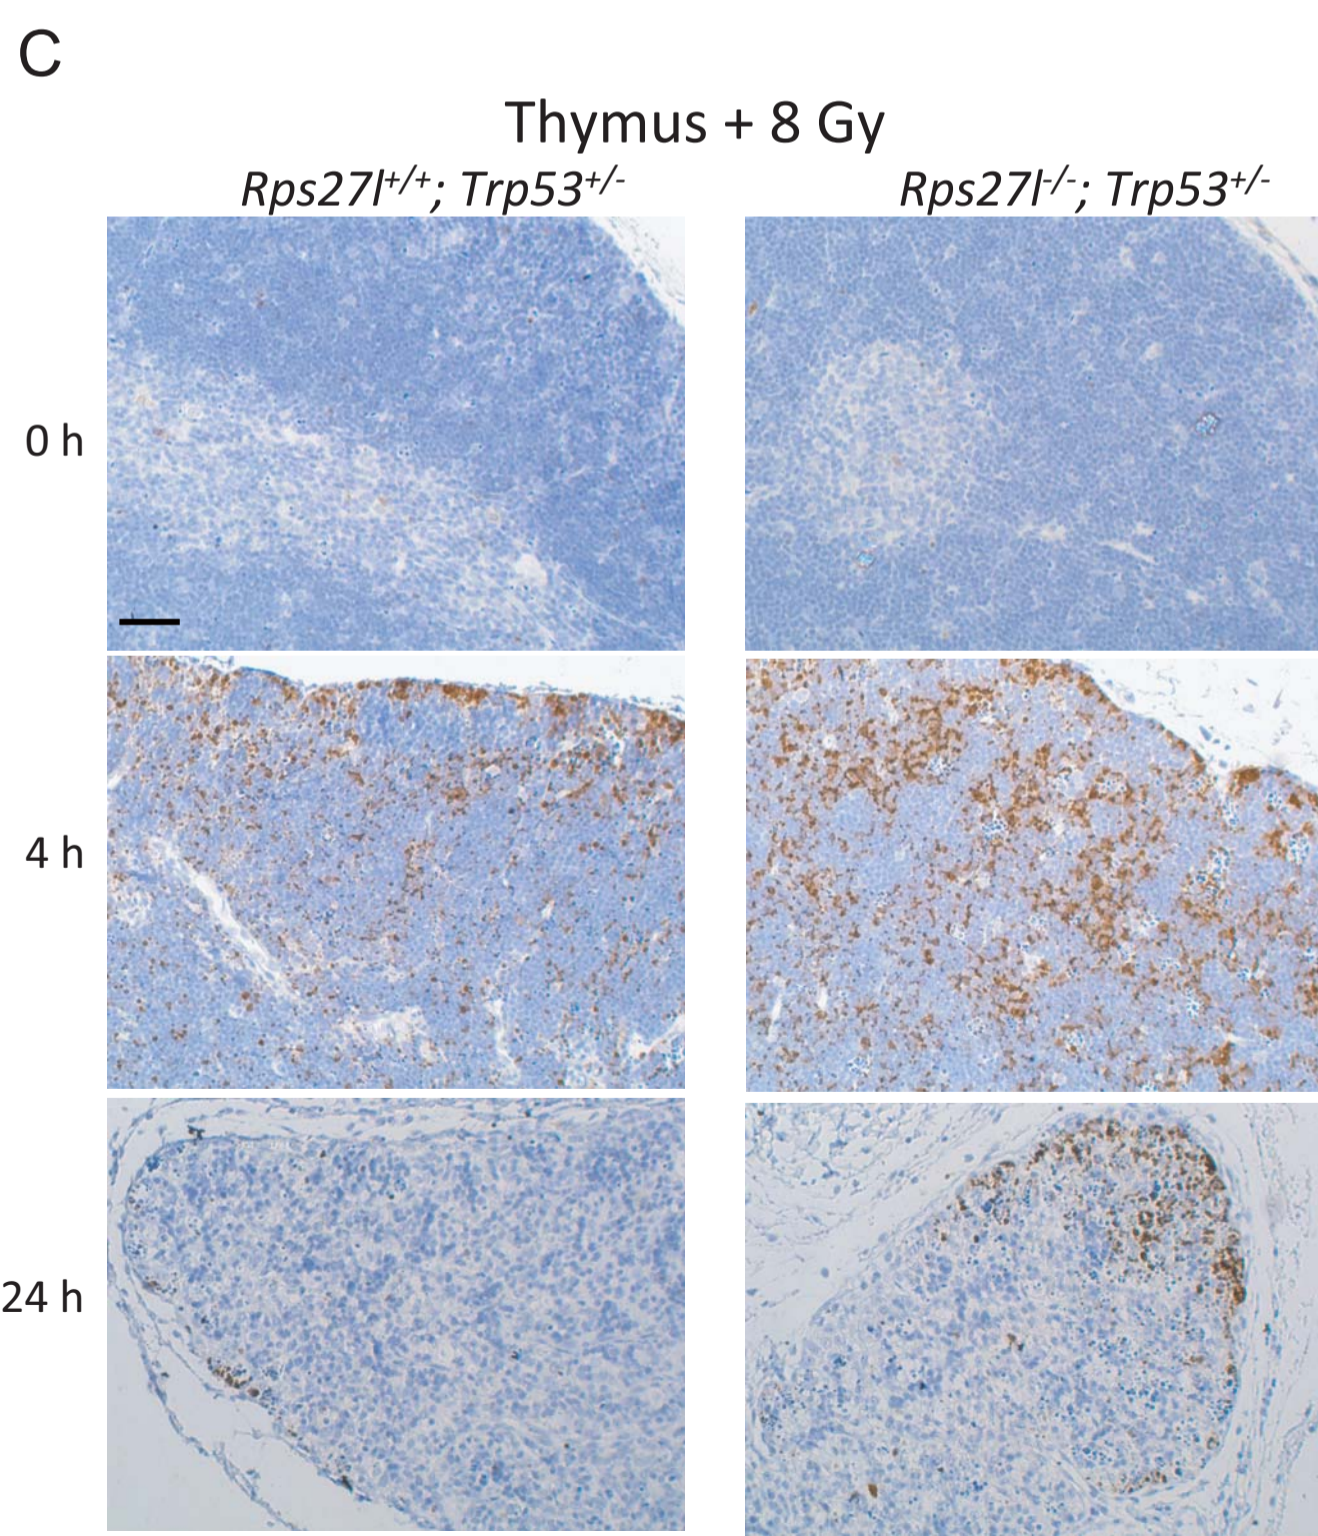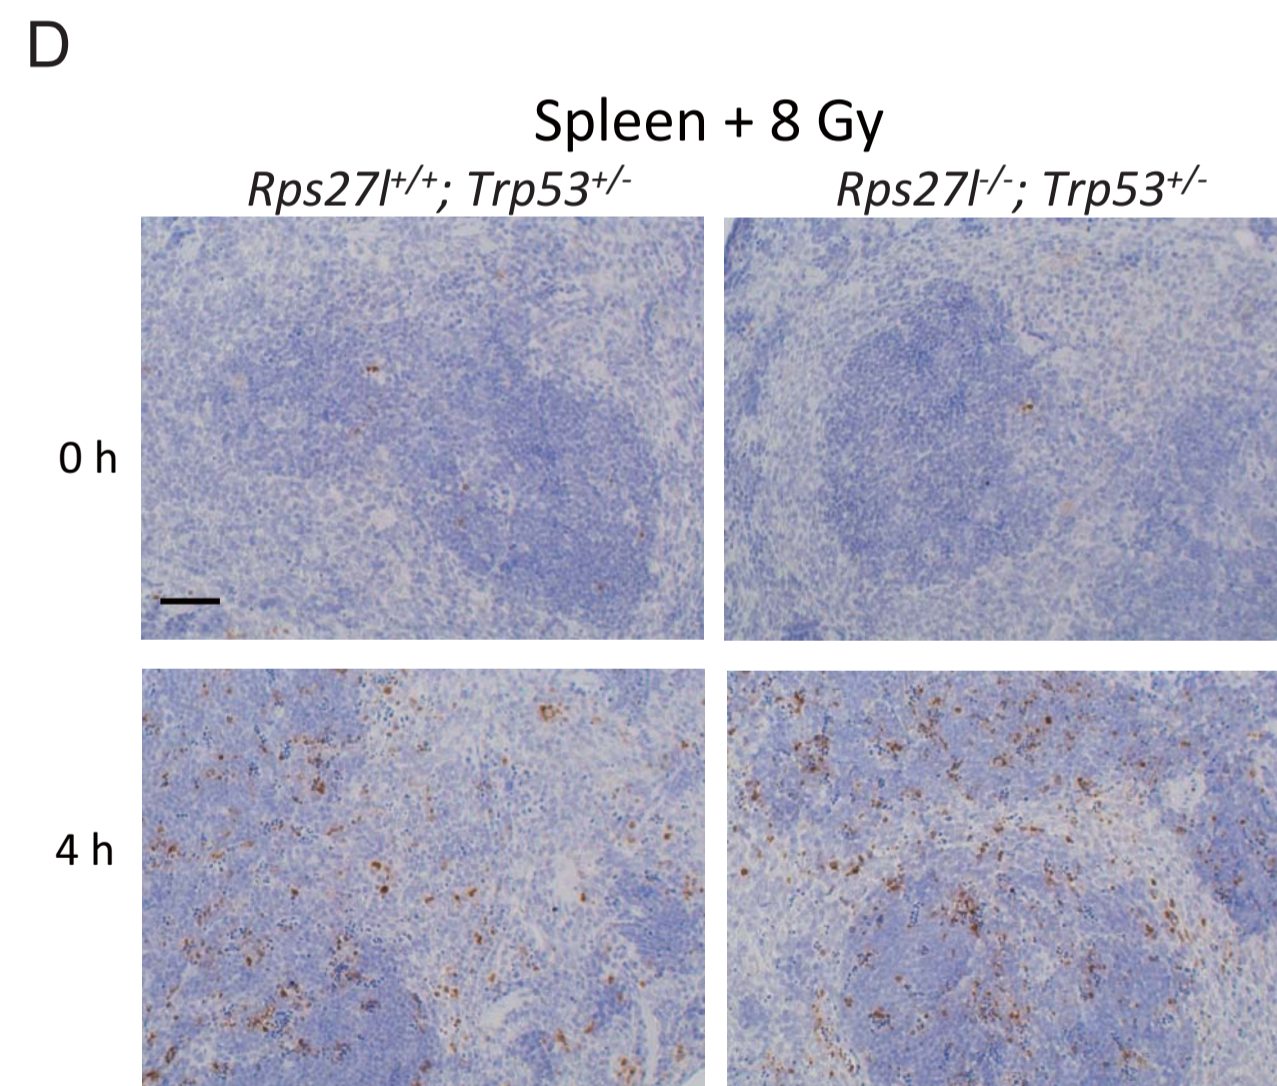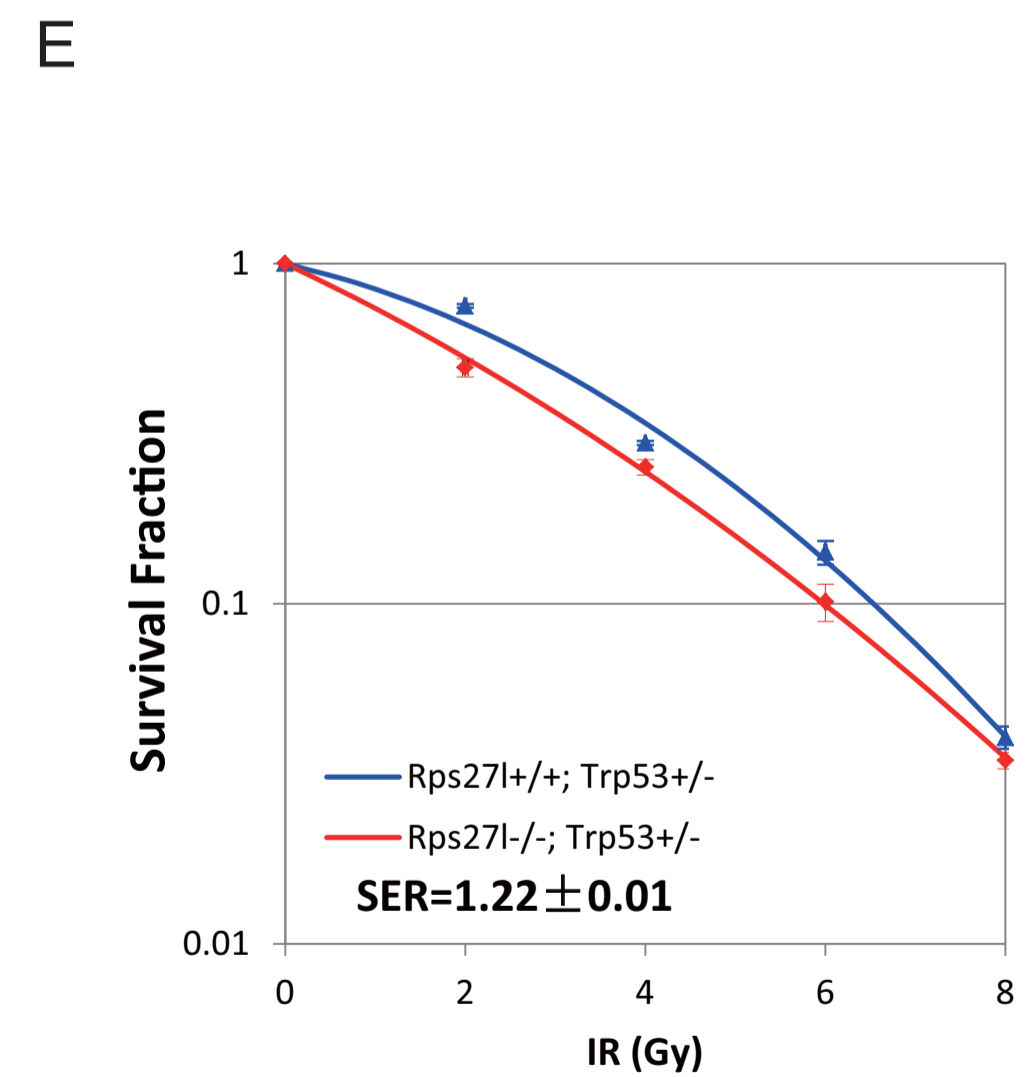

A

Thymus + 8 Gy

*Rps27l<sup>+/+</sup>;Trp53<sup>+/-</sup>**Rps27l<sup>-/-</sup>;Trp53<sup>+/-</sup>*

0 h

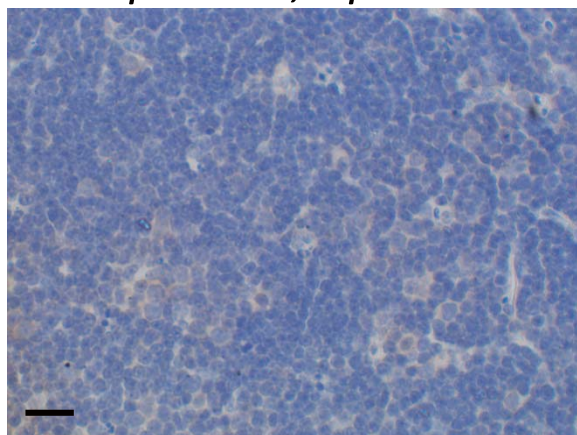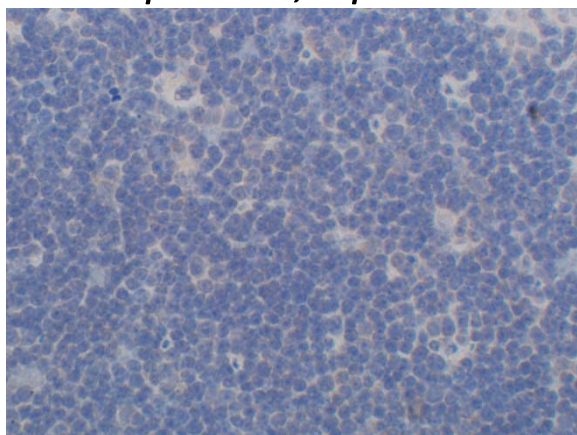

4 h

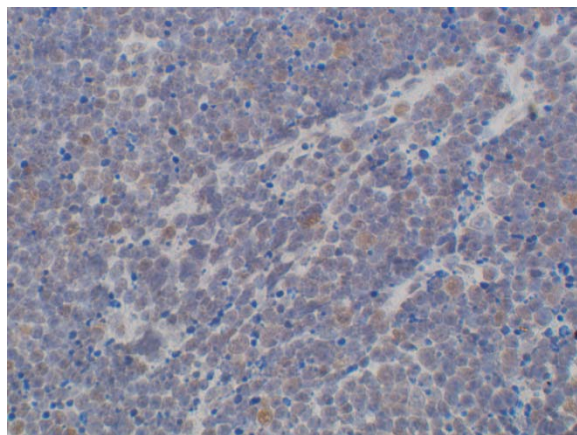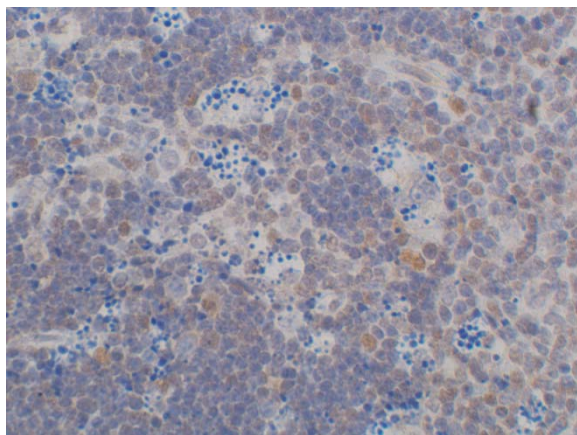

B

Bone Marrow + 8 Gy

*Rps27l<sup>+/+</sup>;Trp53<sup>+/-</sup>**Rps27l<sup>-/-</sup>;Trp53<sup>+/-</sup>*

0 h

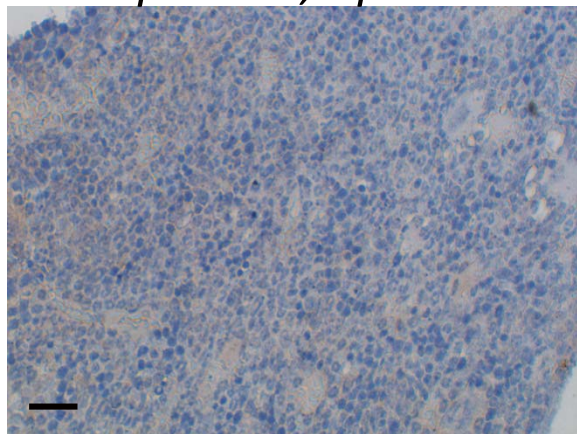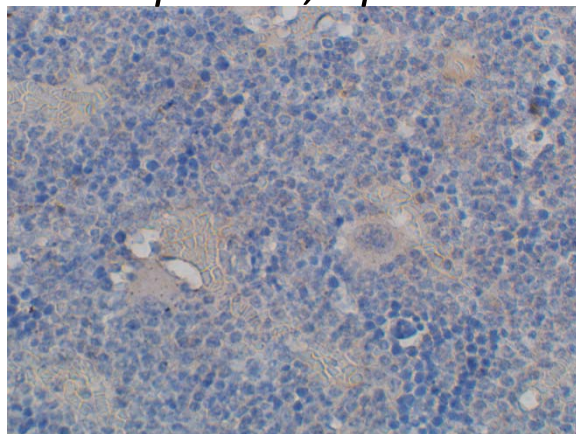

4 h

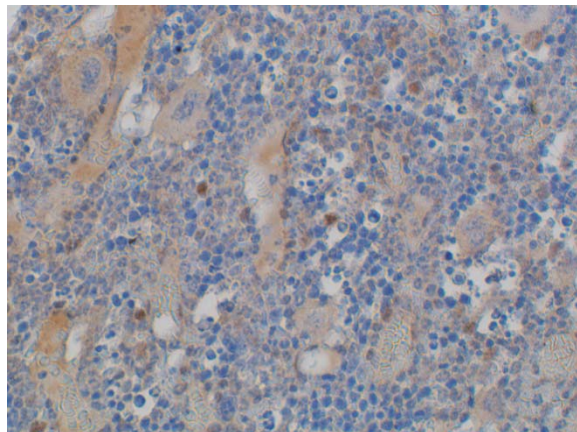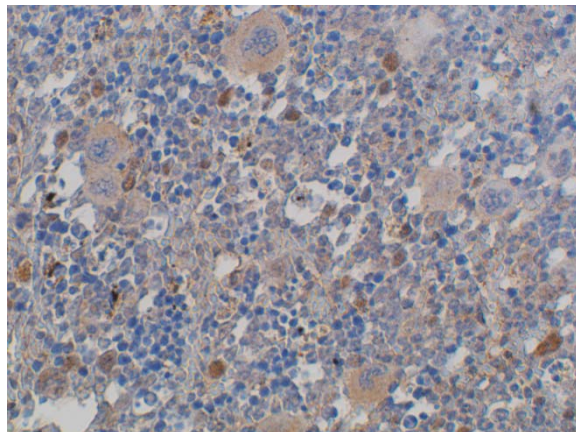

24 h

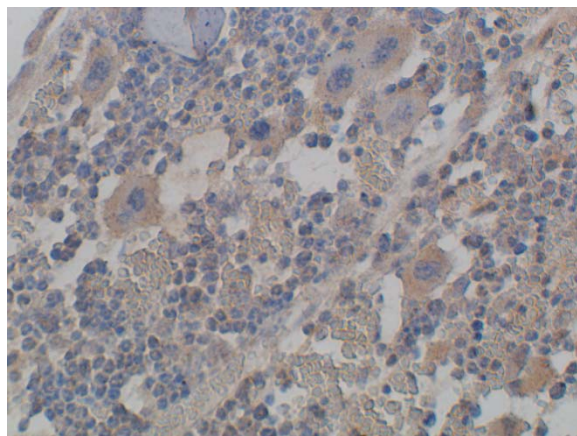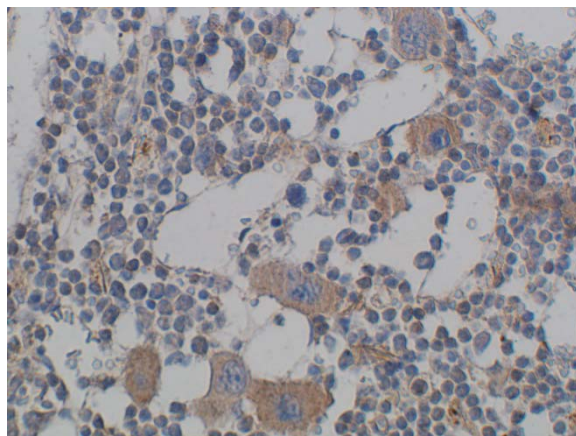

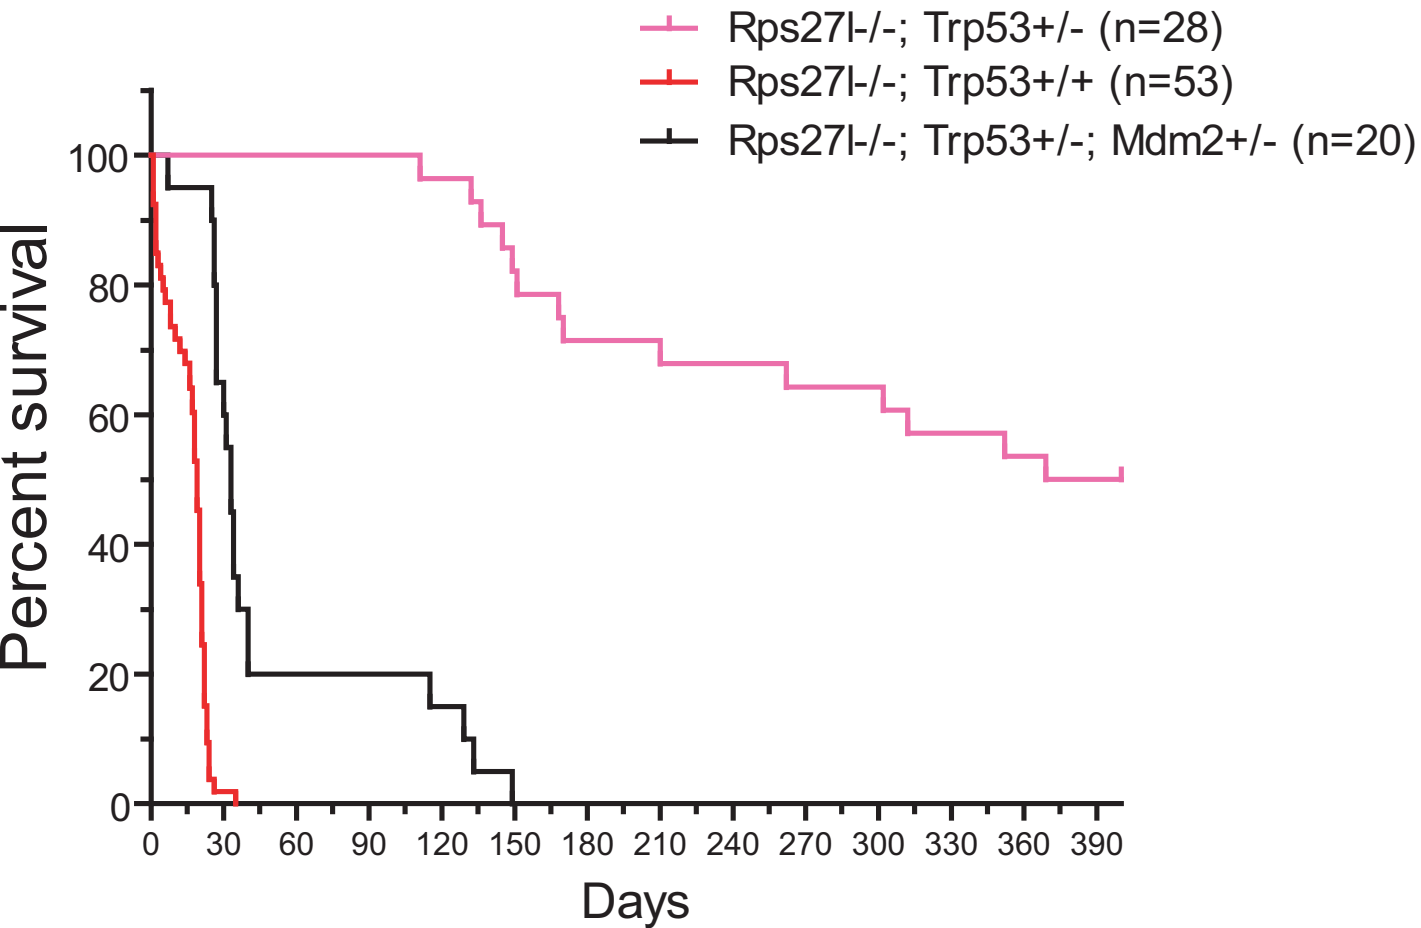

Supplement: 41419_2017_192_MOESM1_ESM.pdf [file 41419_2017_192_MOESM1_ESM.pdf]
